# Supplementary figures and images for: Applied Research of Distinguishing Similar Y-STR&nbsp;Haplotypes by Y Chromosome Complete Sequencing
Source: Research Square preprint supplement (doi:10.21203/rs.3.rs-262197/v1), 2021-03-06

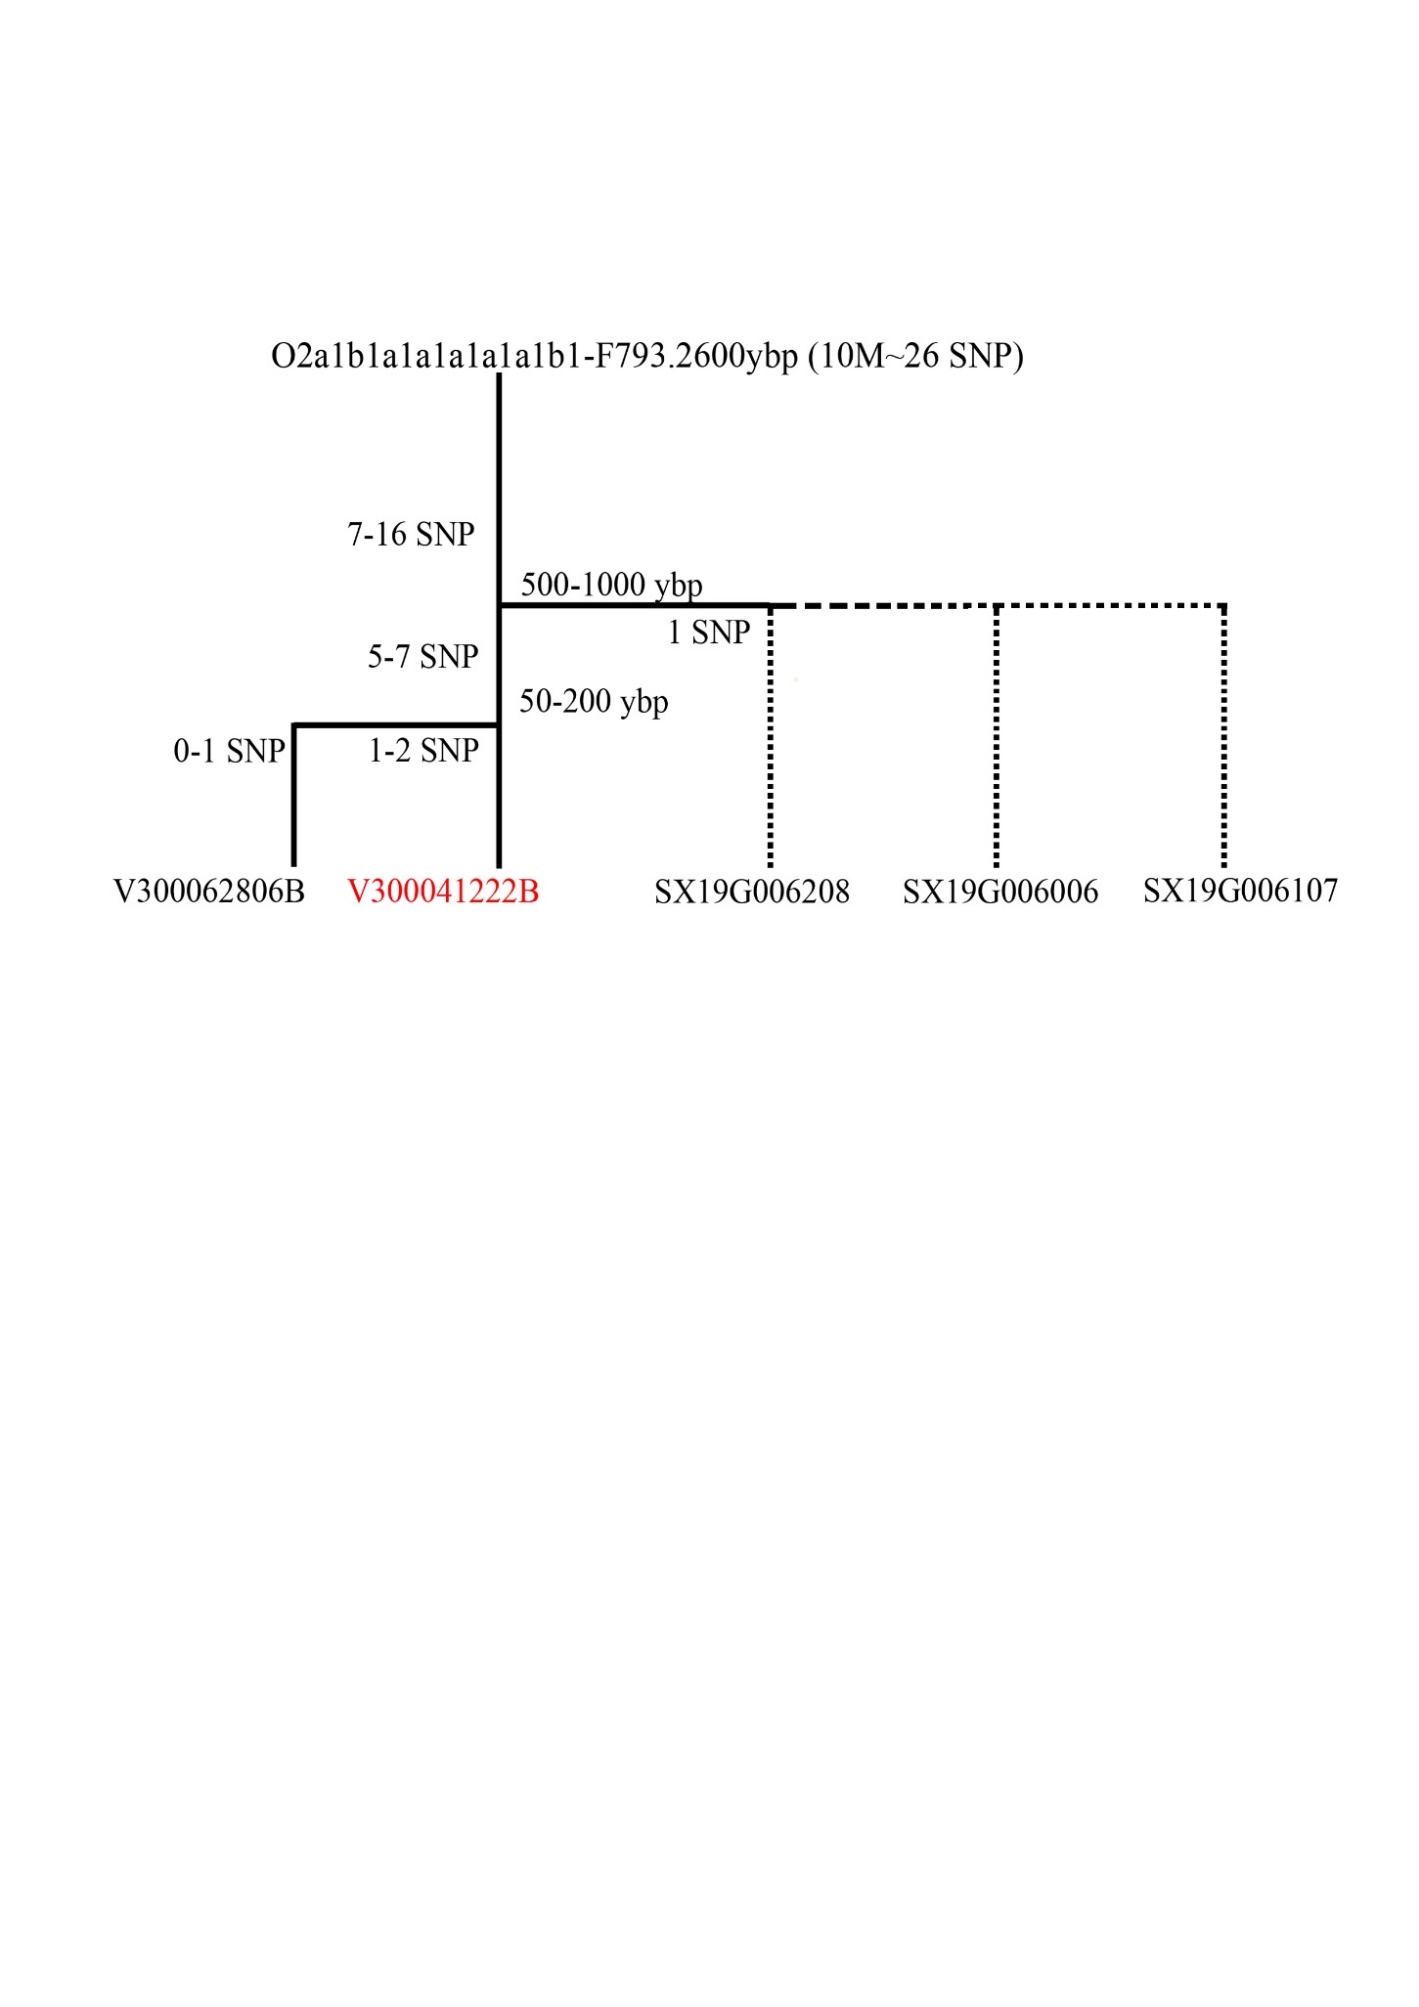


Fig.S1 The procedure of how to deduce coancestry by differentiated SNP sites

Supplement: Supplementary file 2 [file b8fb12a8fd75c2fd9a2442e3.docx]
